# Supplementary material
Source: publisher figshare collection journal article supplement (https://acs.figshare.com/ndownloader/files/3926323)
Supplement: Supplementary file 1 [file 3926323]

  
data_MOSC-II-tPen-Co 
  
_audit_creation_method            SHELXL-97 
_chemical_name_systematic 
; 
 ? 
; 
_chemical_name_common             ? 
_chemical_melting_point           ? 
_chemical_formula_moiety          'C360 H372 Co24 O126 S24' 
_chemical_formula_sum 
 'C360 H372 Co24 O126 S24' 
_chemical_formula_weight          8898.34 
  
loop_ 
 _atom_type_symbol 
 _atom_type_description 
 _atom_type_scat_dispersion_real 
 _atom_type_scat_dispersion_imag 
 _atom_type_scat_source 
 'C'  'C'   0.0033   0.0016 
 'International Tables Vol C Tables 4.2.6.8 and 6.1.1.4' 
 'H'  'H'   0.0000   0.0000 
 'International Tables Vol C Tables 4.2.6.8 and 6.1.1.4' 
 'O'  'O'   0.0106   0.0060 
 'International Tables Vol C Tables 4.2.6.8 and 6.1.1.4' 
 'S'  'S'   0.1246   0.1234 
 'International Tables Vol C Tables 4.2.6.8 and 6.1.1.4' 
 'Co'  'Co'   0.3494   0.9721 
 'International Tables Vol C Tables 4.2.6.8 and 6.1.1.4' 
  
_symmetry_cell_setting            Tetragonal 
_symmetry_space_group_name_H-M    I4/m 
_symmetry_space_group_name_Hall   '-I 4'
  
loop_ 
 _symmetry_equiv_pos_as_xyz 
 'x, y, z' 
 '-y, x, z' 
 '-x, -y, z' 
 'y, -x, z' 
 'x+1/2, y+1/2, z+1/2' 
 '-y+1/2, x+1/2, z+1/2' 
 '-x+1/2, -y+1/2, z+1/2' 
 'y+1/2, -x+1/2, z+1/2' 
 '-x, -y, -z' 
 'y, -x, -z' 
 'x, y, -z' 
 '-y, x, -z' 
 '-x+1/2, -y+1/2, -z+1/2' 
 'y+1/2, -x+1/2, -z+1/2' 
 'x+1/2, y+1/2, -z+1/2' 
 '-y+1/2, x+1/2, -z+1/2' 
  
_cell_length_a                    29.335(6) 
_cell_length_b                    29.335(6) 
_cell_length_c                    41.358(10) 
_cell_angle_alpha                 90.00 
_cell_angle_beta                  90.00 
_cell_angle_gamma                 90.00 
_cell_volume                      35590(14) 
_cell_formula_units_Z             2 
_cell_measurement_temperature     100(2) 
_cell_measurement_reflns_used     9776 
_cell_measurement_theta_min       2.14 
_cell_measurement_theta_max       23.02 
  
_exptl_crystal_description        block 
_exptl_crystal_colour             pink 
_exptl_crystal_size_max           0.81 
_exptl_crystal_size_mid           0.56 
_exptl_crystal_size_min           0.54 
_exptl_crystal_density_meas       none 
_exptl_crystal_density_diffrn     0.830 
_exptl_crystal_density_method     'not measured' 
_exptl_crystal_F_000              9144 
_exptl_absorpt_coefficient_mu     0.660 
_exptl_absorpt_correction_type    multi-scan 
_exptl_absorpt_correction_T_min   0.6169 
_exptl_absorpt_correction_T_max   0.7169 
_exptl_absorpt_process_details    SADABS 
  
_exptl_special_details 
; 
 ? 
; 
  
_diffrn_ambient_temperature       100(2) 
_diffrn_radiation_wavelength      0.71073 
_diffrn_radiation_type            MoK\a 
_diffrn_radiation_source          'fine-focus sealed tube' 
_diffrn_radiation_monochromator   graphite 
_diffrn_measurement_device_type   'CCD area detector' 
_diffrn_measurement_method        'phi and omega scans' 
_diffrn_detector_area_resol_mean  ? 
_diffrn_standards_number          ? 
_diffrn_standards_interval_count  ? 
_diffrn_standards_interval_time   ? 
_diffrn_standards_decay_%         ? 
_diffrn_reflns_number             65844 
_diffrn_reflns_av_R_equivalents   0.1375 
_diffrn_reflns_av_sigmaI/netI     0.1342 
_diffrn_reflns_limit_h_min        -32 
_diffrn_reflns_limit_h_max        32 
_diffrn_reflns_limit_k_min        -32 
_diffrn_reflns_limit_k_max        32 
_diffrn_reflns_limit_l_min        -45 
_diffrn_reflns_limit_l_max        45 
_diffrn_reflns_theta_min          1.96 
_diffrn_reflns_theta_max          23.01 
_reflns_number_total              10405 
_reflns_number_gt                 5242 
_reflns_threshold_expression      >2sigma(I) 
  
_computing_data_collection        'Bruker SMART' 
_computing_cell_refinement        'Bruker SMART' 
_computing_data_reduction         'Bruker SAINT' 
_computing_structure_solution     'SHELXS-97 (Sheldrick, 1990)' 
_computing_structure_refinement   'SHELXL-97 (Sheldrick, 1997)' 
_computing_molecular_graphics     'Bruker SHELXTL' 
_computing_publication_material   'Bruker SHELXTL' 
  
_refine_special_details 
; 
 Refinement of F^2^ against ALL reflections.  The weighted R-factor wR and 
 goodness of fit S are based on F^2^, conventional R-factors R are based 
 on F, with F set to zero for negative F^2^. The threshold expression of 
 F^2^ > 2sigma(F^2^) is used only for calculating R-factors(gt) etc. and is 
 not relevant to the choice of reflections for refinement.  R-factors based 
 on F^2^ are statistically about twice as large as those based on F, and R- 
 factors based on ALL data will be even larger. 

 The crystal had weak diffractions, especially at higher Bragg angles. 
 The situation did not improve even with very long exposure time.
 Nevertheless, the refined structure has a data-to-parameter ratio of 16.3
 (10405 independent reflections, 5242 observed (2 sigma threshold), 
 640 parameters) and therefore we believe the refinement is reasonable 
 and reliable.

 This structure contains t-pentyl groups. 
 Even though this data set was collected at 100K, the thermal parameters for 
 some of the t-pentyl groups were very high. Attempts were made to model 
 the t-pentyl groups as disordering but they were not successful. 
 The conclusion is that these groups are not well defined 
 and were thus refined by using SIMU and ISOR restraints. Some of the 
 hydrogen atoms on t-pentyl groups were not found, 
 and were not included in the list of atoms, but they are included in 
 the total atomic formula. 
; 
  
_refine_ls_structure_factor_coef  Fsqd 
_refine_ls_matrix_type            full 
_refine_ls_weighting_scheme       calc 
_refine_ls_weighting_details 
 'calc w=1/[\s^2^(Fo^2^)+(0.2000P)^2^+0.0000P] where P=(Fo^2^+2Fc^2^)/3' 
_atom_sites_solution_primary      direct 
_atom_sites_solution_secondary    difmap 
_atom_sites_solution_hydrogens    geom 
_refine_ls_hydrogen_treatment     mixed 
_refine_ls_extinction_method      none 
_refine_ls_extinction_coef        ? 
_refine_ls_number_reflns          10405 
_refine_ls_number_parameters      640 
_refine_ls_number_restraints      125 
_refine_ls_R_factor_all           0.1917 
_refine_ls_R_factor_gt            0.1391 
_refine_ls_wR_factor_ref          0.3755 
_refine_ls_wR_factor_gt           0.3470 
_refine_ls_goodness_of_fit_ref    1.121 
_refine_ls_restrained_S_all       1.127 
_refine_ls_shift/su_max           0.000 
_refine_ls_shift/su_mean          0.000 
  
loop_ 
 _atom_site_label 
 _atom_site_type_symbol 
 _atom_site_fract_x 
 _atom_site_fract_y 
 _atom_site_fract_z 
 _atom_site_U_iso_or_equiv 
 _atom_site_adp_type 
 _atom_site_occupancy 
 _atom_site_symmetry_multiplicity 
 _atom_site_calc_flag 
 _atom_site_refinement_flags 
 _atom_site_disorder_assembly 
 _atom_site_disorder_group 
Co1 Co 0.58221(5) 0.19596(4) 0.46367(3) 0.0636(5) Uani 1 1 d . . . 
Co2 Co 0.67550(5) 0.23540(5) 0.46350(3) 0.0655(5) Uani 1 1 d . . . 
Co3 Co 0.47703(5) 0.43180(5) 0.27761(3) 0.0637(5) Uani 1 1 d . . . 
S1 S 0.57488(10) 0.10063(11) 0.43208(7) 0.0809(8) Uani 1 1 d . . . 
S2 S 0.74805(10) 0.17412(11) 0.43200(7) 0.0773(8) Uani 1 1 d . . . 
S3 S 0.46088(10) 0.37147(9) 0.21684(6) 0.0710(7) Uani 1 1 d . . . 
O1 O 0.6205(3) 0.2343(3) 0.5000 0.064(2) Uani 1 2 d S . . 
O2 O 0.5787(3) 0.1463(3) 0.5000 0.060(2) Uani 1 2 d S . . 
O3 O 0.5544(3) 0.1440(3) 0.43466(18) 0.086(2) Uani 1 1 d . . . 
O4 O 0.5519(3) 0.0681(3) 0.4122(2) 0.106(3) Uani 1 1 d . . . 
O5 O 0.6473(2) 0.1712(2) 0.45052(16) 0.0674(17) Uani 1 1 d . . . 
O6 O 0.7322(3) 0.2196(3) 0.43308(19) 0.090(2) Uani 1 1 d . . . 
O7 O 0.7868(3) 0.1668(3) 0.41115(19) 0.087(2) Uani 1 1 d . . . 
O8 O 0.7126(3) 0.2018(4) 0.5000 0.074(3) Uani 1 2 d S . . 
O9 O 0.5000 0.5000 0.2933(4) 0.073(3) Uani 1 4 d S . . 
O11 O 0.4605(3) 0.3718(2) 0.25025(18) 0.079(2) Uani 1 1 d . . . 
O12 O 0.4483(3) 0.3306(3) 0.2020(2) 0.091(2) Uani 1 1 d . . . 
O13 O 0.5777(3) 0.2394(3) 0.4264(2) 0.093(2) Uani 1 1 d . . . 
O14 O 0.6485(3) 0.2677(3) 0.4247(2) 0.093(2) Uani 1 1 d . . . 
O15 O 0.5181(3) 0.2184(3) 0.4726(2) 0.088(2) Uani 1 1 d . . . 
O17 O 0.5115(3) 0.3938(2) 0.30898(15) 0.0735(18) Uani 1 1 d . . . 
O18 O 0.4235(3) 0.4190(3) 0.30680(16) 0.081(2) Uani 1 1 d . . . 
C1 C 0.5773(4) 0.1022(3) 0.5000 0.049(3) Uani 1 2 d S . . 
C2 C 0.5780(4) 0.0771(4) 0.4715(3) 0.080(3) Uani 1 1 d . . . 
C3 C 0.5817(5) 0.0305(6) 0.4718(5) 0.126(6) Uani 1 1 d . . . 
H3 H 0.5863 0.0151 0.4519 0.152 Uiso 1 1 calc R . . 
C4 C 0.5789(6) 0.0049(7) 0.5000 0.114(8) Uani 1 2 d S . . 
C5 C 0.5796(10) -0.0442(8) 0.5000 0.202(11) Uani 1 2 d SDU . . 
C7 C 0.6309(10) -0.0616(7) 0.5000 0.200(12) Uani 1 2 d SDU . . 
C8 C 0.6775(14) -0.041(2) 0.5000 0.48(7) Uani 1 2 d SD . . 
H8A H 0.6972 -0.0674 0.5000 0.716 Uiso 1 2 d SR . . 
H8B H 0.6833 -0.0232 0.4811 0.716 Uiso 0.50 1 d PR . . 
C9 C 0.6597(3) 0.1389(3) 0.4313(2) 0.055(2) Uani 1 1 d . . . 
C10 C 0.6314(4) 0.1051(4) 0.4194(3) 0.076(3) Uani 1 1 d . . . 
C11 C 0.6433(4) 0.0751(5) 0.3960(4) 0.103(4) Uani 1 1 d . . . 
H11 H 0.6207 0.0550 0.3878 0.124 Uiso 1 1 calc R . . 
C12 C 0.6876(5) 0.0725(6) 0.3834(3) 0.109(4) Uani 1 1 d . . . 
C13 C 0.7190(4) 0.1055(4) 0.3961(3) 0.080(3) Uani 1 1 d . . . 
H13 H 0.7499 0.1053 0.3893 0.096 Uiso 1 1 calc R . . 
C14 C 0.7043(4) 0.1379(3) 0.4183(2) 0.072(3) Uani 1 1 d . . . 
C15 C 0.7013(8) 0.0369(8) 0.3611(6) 0.160(7) Uani 1 1 d U . . 
C16 C 0.6947(10) -0.0038(9) 0.3733(8) 0.218(11) Uani 1 1 d U . . 
H16A H 0.6643 -0.0146 0.3673 0.327 Uiso 1 1 calc R . . 
H16B H 0.6972 -0.0024 0.3969 0.327 Uiso 1 1 calc R . . 
H16C H 0.7177 -0.0248 0.3648 0.327 Uiso 1 1 calc R . . 
C17 C 0.7541(8) 0.0368(8) 0.3560(7) 0.185(8) Uani 1 1 d U . . 
H17A H 0.7674 0.0105 0.3672 0.278 Uiso 1 1 calc R . . 
H17B H 0.7671 0.0649 0.3648 0.278 Uiso 1 1 calc R . . 
H17C H 0.7609 0.0348 0.3329 0.278 Uiso 1 1 calc R . . 
C18 C 0.6722(11) 0.0366(10) 0.3326(7) 0.199(8) Uani 1 1 d U . . 
H18A H 0.6400 0.0447 0.3370 0.239 Uiso 1 1 calc R . . 
H18B H 0.6744 0.0084 0.3195 0.239 Uiso 1 1 calc R . . 
C19 C 0.7040(16) 0.0801(15) 0.3185(11) 0.293(15) Uani 1 1 d U . . 
H19A H 0.6867 0.1085 0.3203 0.440 Uiso 1 1 calc R . . 
H19B H 0.7118 0.0745 0.2959 0.440 Uiso 1 1 calc R . . 
H19C H 0.7320 0.0825 0.3314 0.440 Uiso 1 1 calc R . . 
C20 C 0.7463(3) 0.1733(3) 0.5000 0.041(3) Uani 1 2 d S . . 
C21 C 0.7648(4) 0.1561(3) 0.4715(3) 0.071(3) Uani 1 1 d . . . 
C22 C 0.7978(4) 0.1232(5) 0.4706(3) 0.089(3) Uani 1 1 d . . . 
H22 H 0.8086 0.1109 0.4507 0.107 Uiso 1 1 calc R . . 
C23 C 0.8142(6) 0.1089(5) 0.5000 0.087(5) Uani 1 2 d S . . 
C24 C 0.8550(6) 0.0710(8) 0.5000 0.106(6) Uani 1 2 d SD . . 
C25 C 0.8539(6) 0.0410(6) 0.4711(4) 0.132(6) Uani 1 1 d D . . 
H25A H 0.8550 0.0597 0.4515 0.197 Uiso 1 1 calc R . . 
H25B H 0.8258 0.0230 0.4713 0.197 Uiso 1 1 calc R . . 
H25C H 0.8803 0.0205 0.4716 0.197 Uiso 1 1 calc R . . 
C31 C 0.5153(4) 0.3866(3) 0.2028(2) 0.065(3) Uani 1 1 d . . . 
C32 C 0.5244(5) 0.3651(5) 0.1746(4) 0.113(5) Uani 1 1 d . . . 
H32 H 0.5029 0.3446 0.1654 0.136 Uiso 1 1 calc R . . 
C33 C 0.5683(6) 0.3742(6) 0.1584(4) 0.119(5) Uani 1 1 d . . . 
C34 C 0.5803(9) 0.3497(9) 0.1267(6) 0.173(6) Uani 1 1 d DU . . 
C35 C 0.5350(11) 0.3528(12) 0.1032(8) 0.227(12) Uani 1 1 d U . . 
H35A H 0.5085 0.3405 0.1147 0.340 Uiso 1 1 calc R . . 
H35B H 0.5403 0.3350 0.0835 0.340 Uiso 1 1 calc R . . 
H35C H 0.5293 0.3847 0.0975 0.340 Uiso 1 1 calc R . . 
C36 C 0.6178(8) 0.3774(9) 0.1088(6) 0.180(8) Uani 1 1 d U . . 
H36A H 0.6089 0.4096 0.1080 0.270 Uiso 1 1 calc R . . 
H36B H 0.6212 0.3657 0.0867 0.270 Uiso 1 1 calc R . . 
H36C H 0.6468 0.3744 0.1204 0.270 Uiso 1 1 calc R . . 
C37 C 0.5945(10) 0.3030(9) 0.1328(6) 0.201(7) Uani 1 1 d DU . . 
H37A H 0.5987 0.2865 0.1121 0.241 Uiso 1 1 calc R . . 
H37B H 0.5713 0.2868 0.1458 0.241 Uiso 1 1 calc R . . 
C38 C 0.6461(12) 0.3057(12) 0.1539(8) 0.247(11) Uani 1 1 d DU . . 
H38A H 0.6684 0.3229 0.1412 0.371 Uiso 1 1 calc R . . 
H38B H 0.6575 0.2747 0.1577 0.371 Uiso 1 1 calc R . . 
H38C H 0.6413 0.3209 0.1747 0.371 Uiso 1 1 calc R . . 
C39 C 0.6053(5) 0.2664(4) 0.4154(2) 0.076(3) Uani 1 1 d . . . 
C40 C 0.5934(4) 0.2985(5) 0.3890(3) 0.088(3) Uani 1 1 d . . . 
C41 C 0.5502(5) 0.3006(5) 0.3795(4) 0.119(6) Uani 1 1 d . . . 
H41 H 0.5282 0.2811 0.3892 0.143 Uiso 1 1 calc R . . 
C42 C 0.5367(4) 0.3312(5) 0.3557(3) 0.102(4) Uani 1 1 d . . . 
H42 H 0.5060 0.3316 0.3485 0.122 Uiso 1 1 calc R . . 
C43 C 0.5690(5) 0.3618(5) 0.3421(3) 0.096(4) Uani 1 1 d . . . 
C44 C 0.6117(7) 0.3603(5) 0.3541(4) 0.117(5) Uani 1 1 d . . . 
H44 H 0.6339 0.3817 0.3470 0.141 Uiso 1 1 calc R . . 
C45 C 0.6230(5) 0.3284(5) 0.3762(4) 0.107(4) Uani 1 1 d . . . 
H45 H 0.6538 0.3269 0.3831 0.129 Uiso 1 1 calc R . . 
C46 C 0.5542(6) 0.3961(5) 0.3175(3) 0.096(4) Uani 1 1 d . . . 
C47 C 0.5015(6) 0.2247(5) 0.5000 0.084(5) Uani 1 2 d S . . 
C48 C 0.4516(5) 0.2374(6) 0.5000 0.093(5) Uani 1 2 d S . . 
C49 C 0.4260(5) 0.2462(6) 0.4725(4) 0.119(5) Uani 1 1 d . . . 
H49 H 0.4407 0.2385 0.4528 0.143 Uiso 1 1 calc R . . 
C50 C 0.3860(4) 0.2631(5) 0.4692(4) 0.100(4) Uani 1 1 d . . . 
H50 H 0.3727 0.2709 0.4490 0.119 Uiso 1 1 calc R . . 
C6 C 0.5504(12) -0.0636(9) 0.5279(10) 0.291(16) Uani 1 1 d U . . 
H6A H 0.5199 -0.0500 0.5272 0.437 Uiso 1 1 calc R . . 
H6B H 0.5649 -0.0562 0.5487 0.437 Uiso 1 1 calc R . . 
H6C H 0.5480 -0.0967 0.5257 0.437 Uiso 1 1 calc R . . 
C26 C 0.8958(12) 0.0953(14) 0.5126(9) 0.158(12) Uani 0.50 1 d PDU . . 
C27 C 0.9018(16) 0.1436(15) 0.5282(11) 0.165(12) Uani 0.50 1 d PDU . . 
C51 C 0.3636(6) 0.2687(6) 0.5000 0.099(6) Uani 1 2 d S . . 
C52 C 0.3153(6) 0.2887(5) 0.5000 0.093(6) Uani 1 2 d S . . 
O16 O 0.2961(3) 0.2973(3) 0.5274(2) 0.091(2) Uani 1 1 d . . . 
C28 C 0.5978(5) 0.4039(5) 0.1729(4) 0.112(4) Uani 1 1 d . . . 
H28A H 0.6258 0.4118 0.1628 0.134 Uiso 1 1 calc R . . 
C29 C 0.5858(4) 0.4225(4) 0.2031(2) 0.077(3) Uani 1 1 d . . . 
C30 C 0.5431(3) 0.4171(3) 0.2165(2) 0.060(2) Uani 1 1 d . . . 
O10 O 0.5315(2) 0.4375(2) 0.24459(15) 0.0649(17) Uani 1 1 d . . . 
  
loop_ 
 _atom_site_aniso_label 
 _atom_site_aniso_U_11 
 _atom_site_aniso_U_22 
 _atom_site_aniso_U_33 
 _atom_site_aniso_U_23 
 _atom_site_aniso_U_13 
 _atom_site_aniso_U_12 
Co1 0.0656(9) 0.0600(8) 0.0654(9) 0.0047(6) 0.0002(6) 0.0074(6) 
Co2 0.0671(9) 0.0574(8) 0.0720(10) 0.0033(6) 0.0000(6) 0.0045(6) 
Co3 0.0733(9) 0.0731(9) 0.0448(8) 0.0052(5) 0.0031(6) -0.0007(6) 
S1 0.0753(18) 0.084(2) 0.0835(19) -0.0179(14) 0.0040(14) -0.0044(14) 
S2 0.0748(17) 0.088(2) 0.0692(17) 0.0066(13) 0.0033(13) 0.0045(14) 
S3 0.0828(18) 0.0672(16) 0.0632(17) -0.0110(12) 0.0082(12) -0.0007(12) 
O1 0.072(6) 0.070(6) 0.049(5) 0.000 0.000 -0.002(4) 
O2 0.070(6) 0.047(5) 0.063(5) 0.000 0.000 0.011(4) 
O3 0.101(6) 0.082(5) 0.074(5) 0.005(4) -0.020(4) -0.003(4) 
O4 0.105(6) 0.106(6) 0.108(6) -0.015(5) -0.016(5) 0.006(5) 
O5 0.076(4) 0.061(4) 0.065(4) -0.013(3) 0.010(3) -0.002(3) 
O6 0.073(5) 0.116(7) 0.081(5) 0.011(4) 0.011(4) 0.002(4) 
O7 0.079(5) 0.106(6) 0.075(5) 0.018(4) 0.020(4) 0.015(4) 
O8 0.066(6) 0.090(7) 0.066(6) 0.000 0.000 -0.008(5) 
O9 0.062(5) 0.062(5) 0.094(10) 0.000 0.000 0.000 
O11 0.090(5) 0.067(4) 0.079(5) -0.002(3) -0.003(4) -0.013(3) 
O12 0.093(5) 0.070(5) 0.110(6) -0.014(4) 0.026(4) -0.004(4) 
O13 0.075(5) 0.078(5) 0.126(7) 0.029(5) 0.022(5) 0.013(4) 
O14 0.119(7) 0.072(5) 0.087(5) 0.019(4) -0.014(5) 0.019(4) 
O15 0.073(5) 0.110(6) 0.082(5) 0.004(4) -0.018(4) 0.007(4) 
O17 0.079(5) 0.091(5) 0.051(4) 0.028(3) -0.007(3) -0.002(4) 
O18 0.067(4) 0.126(6) 0.051(4) -0.001(4) 0.029(3) -0.007(4) 
C1 0.050(7) 0.021(6) 0.076(8) 0.000 0.000 -0.007(4) 
C2 0.072(7) 0.056(7) 0.111(9) -0.014(6) 0.015(6) 0.000(5) 
C3 0.087(10) 0.093(13) 0.20(2) -0.057(11) -0.007(10) 0.004(8) 
C4 0.062(11) 0.061(12) 0.22(3) 0.000 0.000 -0.010(8) 
C5 0.154(17) 0.054(11) 0.40(4) 0.000 0.000 -0.009(11) 
C7 0.153(17) 0.036(9) 0.41(4) 0.000 0.000 0.022(10) 
C8 0.25(7) 0.69(17) 0.49(12) 0.000 0.000 0.35(10) 
C9 0.061(6) 0.061(6) 0.043(5) 0.001(4) 0.007(4) 0.015(4) 
C10 0.094(8) 0.067(6) 0.066(6) -0.017(5) 0.006(5) 0.009(5) 
C11 0.070(8) 0.120(11) 0.120(11) -0.002(9) -0.019(7) -0.006(7) 
C12 0.105(11) 0.139(13) 0.084(9) 0.013(8) 0.019(8) 0.021(9) 
C13 0.098(8) 0.074(7) 0.069(7) 0.017(6) 0.015(6) -0.002(6) 
C14 0.093(8) 0.066(6) 0.058(6) 0.008(5) -0.006(5) 0.023(5) 
C15 0.156(14) 0.135(12) 0.189(15) -0.066(12) 0.064(12) -0.018(11) 
C16 0.21(2) 0.148(15) 0.30(3) -0.105(16) 0.11(2) -0.015(16) 
C17 0.180(15) 0.137(12) 0.239(16) -0.027(12) 0.043(13) 0.002(11) 
C18 0.214(18) 0.194(16) 0.188(17) -0.080(14) 0.064(14) -0.041(14) 
C19 0.31(2) 0.31(2) 0.26(2) -0.019(17) 0.033(17) -0.004(17) 
C20 0.018(5) 0.035(6) 0.069(8) 0.000 0.000 0.000(4) 
C21 0.065(6) 0.067(6) 0.081(7) 0.004(5) 0.035(5) -0.001(5) 
C22 0.058(6) 0.102(9) 0.106(9) 0.021(7) 0.002(6) -0.003(6) 
C23 0.099(12) 0.070(10) 0.092(12) 0.000 0.000 -0.038(9) 
C24 0.063(11) 0.142(17) 0.114(15) 0.000 0.000 0.020(10) 
C25 0.131(13) 0.158(15) 0.106(11) 0.011(10) 0.010(9) 0.072(11) 
C31 0.084(7) 0.074(6) 0.038(5) -0.013(4) -0.007(4) -0.016(5) 
C32 0.104(10) 0.128(11) 0.108(10) -0.056(9) 0.022(8) -0.044(8) 
C33 0.144(14) 0.124(11) 0.089(9) -0.042(8) 0.018(9) 0.009(10) 
C34 0.170(12) 0.182(12) 0.166(12) -0.031(11) 0.023(10) 0.013(10) 
C35 0.202(18) 0.28(2) 0.195(17) -0.047(16) 0.025(15) -0.057(16) 
C36 0.170(17) 0.212(17) 0.157(16) -0.020(14) 0.076(14) 0.042(14) 
C37 0.242(13) 0.182(12) 0.178(12) -0.059(11) 0.057(11) 0.025(11) 
C38 0.270(17) 0.224(18) 0.248(18) -0.005(15) 0.005(14) 0.040(14) 
C39 0.099(9) 0.080(7) 0.051(6) -0.003(5) -0.023(6) 0.008(7) 
C40 0.086(8) 0.099(9) 0.079(7) 0.023(6) -0.008(6) 0.027(7) 
C41 0.080(9) 0.121(11) 0.157(14) 0.091(10) 0.009(8) 0.007(7) 
C42 0.066(7) 0.124(10) 0.115(10) 0.065(9) -0.008(6) 0.014(7) 
C43 0.101(10) 0.123(11) 0.064(7) 0.034(7) 0.006(7) 0.017(8) 
C44 0.154(15) 0.104(10) 0.094(9) 0.018(8) -0.017(9) -0.021(9) 
C45 0.088(9) 0.106(10) 0.128(11) 0.039(9) -0.018(8) -0.006(7) 
C46 0.135(13) 0.086(9) 0.067(8) -0.006(7) -0.013(8) 0.023(9) 
C47 0.103(13) 0.044(8) 0.105(15) 0.000 0.000 0.002(7) 
C48 0.056(10) 0.076(10) 0.147(17) 0.000 0.000 -0.012(8) 
C49 0.067(8) 0.175(15) 0.115(11) 0.041(10) 0.033(7) 0.039(9) 
C50 0.049(7) 0.140(12) 0.110(10) 0.021(8) 0.003(6) 0.030(7) 
C6 0.25(2) 0.125(17) 0.50(4) 0.05(2) 0.10(2) -0.054(17) 
C26 0.132(16) 0.181(17) 0.159(18) 0.018(13) -0.021(13) 0.009(14) 
C27 0.145(16) 0.179(17) 0.169(18) 0.021(14) -0.021(14) 0.015(14) 
C51 0.058(10) 0.073(11) 0.165(19) 0.000 0.000 0.009(7) 
C52 0.079(12) 0.045(8) 0.16(2) 0.000 0.000 -0.022(7) 
O16 0.058(5) 0.098(6) 0.117(7) -0.002(5) -0.011(4) 0.012(4) 
C28 0.093(9) 0.119(11) 0.124(11) -0.029(9) 0.015(8) -0.022(8) 
C29 0.110(9) 0.064(6) 0.057(6) 0.011(5) 0.027(6) 0.021(6) 
C30 0.072(6) 0.082(7) 0.027(5) 0.021(4) 0.008(4) 0.009(5) 
O10 0.073(4) 0.072(4) 0.050(4) -0.014(3) 0.018(3) -0.020(3) 
  
_geom_special_details 
; 
 All esds (except the esd in the dihedral angle between two l.s. planes) 
 are estimated using the full covariance matrix.  The cell esds are taken 
 into account individually in the estimation of esds in distances, angles 
 and torsion angles; correlations between esds in cell parameters are only 
 used when they are defined by crystal symmetry.  An approximate (isotropic) 
 treatment of cell esds is used for estimating esds involving l.s. planes. 
; 
  
loop_ 
 _geom_bond_atom_site_label_1 
 _geom_bond_atom_site_label_2 
 _geom_bond_distance 
 _geom_bond_site_symmetry_2 
 _geom_bond_publ_flag 
Co1 O13 2.004(8) . ? 
Co1 O15 2.026(8) . ? 
Co1 O2 2.094(6) . ? 
Co1 O3 2.105(8) . ? 
Co1 O5 2.116(7) . ? 
Co1 O1 2.187(7) . ? 
Co1 Co2 2.971(2) . ? 
Co2 O16 1.985(8) 12_656 ? 
Co2 O14 2.025(8) . ? 
Co2 O8 2.107(7) . ? 
Co2 O5 2.126(6) . ? 
Co2 O6 2.136(8) . ? 
Co2 O1 2.209(7) . ? 
Co3 O17 1.987(7) . ? 
Co3 O18 2.017(7) . ? 
Co3 O10 2.090(6) 4_565 ? 
Co3 O10 2.108(6) . ? 
Co3 O11 2.147(7) . ? 
Co3 O9 2.209(5) . ? 
Co3 Co3 2.986(2) 2_655 ? 
Co3 Co3 2.986(2) 4_565 ? 
S1 O3 1.410(9) . ? 
S1 O4 1.429(10) . ? 
S1 C10 1.743(12) . ? 
S1 C2 1.773(14) . ? 
S2 O6 1.414(9) . ? 
S2 O7 1.444(8) . ? 
S2 C14 1.760(12) . ? 
S2 C21 1.786(12) . ? 
S3 O11 1.382(8) . ? 
S3 O12 1.397(8) . ? 
S3 C31 1.755(11) . ? 
S3 C29 1.779(13) 4_565 ? 
O1 Co1 2.187(7) 11_556 ? 
O1 Co2 2.209(7) 11_556 ? 
O2 C1 1.297(13) . ? 
O2 Co1 2.094(6) 11_556 ? 
O5 C9 1.287(11) . ? 
O8 C20 1.292(14) . ? 
O8 Co2 2.107(7) 11_556 ? 
O9 Co3 2.209(5) 2_655 ? 
O9 Co3 2.209(5) 4_565 ? 
O9 Co3 2.209(5) 3_665 ? 
O13 C39 1.221(14) . ? 
O14 C39 1.325(14) . ? 
O15 C47 1.248(11) . ? 
O17 C46 1.304(17) . ? 
O18 C46 1.207(17) 4_565 ? 
C1 C2 1.390(13) . ? 
C1 C2 1.390(13) 11_556 ? 
C2 C3 1.37(2) . ? 
C3 C4 1.39(2) . ? 
C3 H3 0.9500 . ? 
C4 C3 1.39(2) 11_556 ? 
C4 C5 1.44(3) . ? 
C5 C6 1.55(3) 11_556 ? 
C5 C6 1.55(3) . ? 
C5 C7 1.59(3) . ? 
C7 C8 1.49(5) . ? 
C8 H8A 0.9599 . ? 
C8 H8B 0.9599 . ? 
C9 C10 1.383(15) . ? 
C9 C14 1.414(15) . ? 
C10 C11 1.354(18) . ? 
C11 C12 1.404(19) . ? 
C11 H11 0.9500 . ? 
C12 C15 1.45(2) . ? 
C12 C13 1.43(2) . ? 
C13 C14 1.389(16) . ? 
C13 H13 0.9500 . ? 
C15 C16 1.31(3) . ? 
C15 C18 1.46(4) . ? 
C15 C17 1.56(3) . ? 
C16 H16A 0.9800 . ? 
C16 H16B 0.9800 . ? 
C16 H16C 0.9800 . ? 
C17 H17A 0.9800 . ? 
C17 H17B 0.9800 . ? 
C17 H17C 0.9800 . ? 
C18 C19 1.68(5) . ? 
C18 H18A 0.9900 . ? 
C18 H18B 0.9900 . ? 
C19 H19A 0.9800 . ? 
C19 H19B 0.9800 . ? 
C19 H19C 0.9800 . ? 
C20 C21 1.394(11) . ? 
C20 C21 1.394(11) 11_556 ? 
C21 C22 1.366(16) . ? 
C22 C23 1.376(15) . ? 
C22 H22 0.9500 . ? 
C23 C22 1.376(15) 11_556 ? 
C23 C24 1.63(3) . ? 
C24 C26 1.49(3) . ? 
C24 C26 1.49(3) 11_556 ? 
C24 C25 1.48(2) . ? 
C24 C25 1.48(2) 11_556 ? 
C25 H25A 0.9800 . ? 
C25 H25B 0.9800 . ? 
C25 H25C 0.9800 . ? 
C31 C30 1.337(14) . ? 
C31 C32 1.351(16) . ? 
C32 C33 1.48(2) . ? 
C32 H32 0.9500 . ? 
C33 C28 1.37(2) . ? 
C33 C34 1.54(3) . ? 
C34 C35 1.65(4) . ? 
C34 C36 1.55(3) . ? 
C34 C37 1.45(3) . ? 
C35 H35A 0.9800 . ? 
C35 H35B 0.9800 . ? 
C35 H35C 0.9800 . ? 
C36 H36A 0.9800 . ? 
C36 H36B 0.9800 . ? 
C36 H36C 0.9800 . ? 
C37 C38 1.75(3) . ? 
C37 H37A 0.9900 . ? 
C37 H37B 0.9900 . ? 
C38 H38A 0.9800 . ? 
C38 H38B 0.9800 . ? 
C38 H38C 0.9800 . ? 
C39 C40 1.484(16) . ? 
C40 C45 1.343(19) . ? 
C40 C41 1.329(18) . ? 
C41 C42 1.390(17) . ? 
C41 H41 0.9500 . ? 
C42 C43 1.421(18) . ? 
C42 H42 0.9500 . ? 
C43 C44 1.35(2) . ? 
C43 C46 1.495(18) . ? 
C44 C45 1.35(2) . ? 
C44 H44 0.9500 . ? 
C45 H45 0.9500 . ? 
C46 O18 1.207(17) 2_655 ? 
C47 O15 1.248(11) 11_556 ? 
C47 C48 1.51(3) . ? 
C48 C49 1.387(18) . ? 
C48 C49 1.387(18) 11_556 ? 
C49 C50 1.281(18) . ? 
C49 H49 0.9500 . ? 
C50 C51 1.442(15) . ? 
C50 H50 0.9500 . ? 
C6 H6A 0.9800 . ? 
C6 H6B 0.9800 . ? 
C6 H6C 0.9800 . ? 
C26 C26 1.04(7) 11_556 ? 
C26 C27 1.57(4) . ? 
C26 C27 2.21(5) 11_556 ? 
C27 C26 2.21(5) 11_556 ? 
C51 C50 1.442(15) 11_556 ? 
C51 C52 1.54(3) . ? 
C52 O16 1.291(12) 11_556 ? 
C52 O16 1.291(12) . ? 
O16 Co2 1.985(8) 10_566 ? 
C28 C29 1.407(18) . ? 
C28 H28A 0.9500 . ? 
C29 C30 1.378(15) . ? 
C29 S3 1.779(13) 2_655 ? 
C30 O10 1.353(11) . ? 
O10 Co3 2.090(6) 2_655 ? 
  
loop_ 
 _geom_angle_atom_site_label_1 
 _geom_angle_atom_site_label_2 
 _geom_angle_atom_site_label_3 
 _geom_angle 
 _geom_angle_site_symmetry_1 
 _geom_angle_site_symmetry_3 
 _geom_angle_publ_flag 
O13 Co1 O15 82.7(3) . . ? 
O13 Co1 O2 172.1(4) . . ? 
O15 Co1 O2 92.9(3) . . ? 
O13 Co1 O3 89.8(3) . . ? 
O15 Co1 O3 88.8(3) . . ? 
O2 Co1 O3 83.5(3) . . ? 
O13 Co1 O5 94.6(3) . . ? 
O15 Co1 O5 175.3(3) . . ? 
O2 Co1 O5 89.4(3) . . ? 
O3 Co1 O5 87.4(3) . . ? 
O13 Co1 O1 103.6(3) . . ? 
O15 Co1 O1 100.7(3) . . ? 
O2 Co1 O1 83.6(3) . . ? 
O3 Co1 O1 164.3(3) . . ? 
O5 Co1 O1 83.6(3) . . ? 
O13 Co1 Co2 79.1(3) . . ? 
O15 Co1 Co2 136.8(3) . . ? 
O2 Co1 Co2 108.5(2) . . ? 
O3 Co1 Co2 129.6(2) . . ? 
O5 Co1 Co2 45.69(17) . . ? 
O1 Co1 Co2 47.79(19) . . ? 
O16 Co2 O14 83.5(4) 12_656 . ? 
O16 Co2 O8 94.4(4) 12_656 . ? 
O14 Co2 O8 171.6(3) . . ? 
O16 Co2 O5 176.3(3) 12_656 . ? 
O14 Co2 O5 93.6(3) . . ? 
O8 Co2 O5 88.1(3) . . ? 
O16 Co2 O6 89.6(4) 12_656 . ? 
O14 Co2 O6 86.5(3) . . ? 
O8 Co2 O6 85.3(3) . . ? 
O5 Co2 O6 87.8(3) . . ? 
O16 Co2 O1 100.2(3) 12_656 . ? 
O14 Co2 O1 105.3(3) . . ? 
O8 Co2 O1 83.1(3) . . ? 
O5 Co2 O1 82.9(3) . . ? 
O6 Co2 O1 165.3(3) . . ? 
O16 Co2 Co1 135.9(3) 12_656 . ? 
O14 Co2 Co1 79.9(3) . . ? 
O8 Co2 Co1 107.0(3) . . ? 
O5 Co2 Co1 45.39(18) . . ? 
O6 Co2 Co1 129.4(2) . . ? 
O1 Co2 Co1 47.17(18) . . ? 
O17 Co3 O18 84.3(3) . . ? 
O17 Co3 O10 176.3(3) . 4_565 ? 
O18 Co3 O10 93.1(3) . 4_565 ? 
O17 Co3 O10 94.7(3) . . ? 
O18 Co3 O10 173.1(3) . . ? 
O10 Co3 O10 87.5(4) 4_565 . ? 
O17 Co3 O11 90.0(3) . . ? 
O18 Co3 O11 89.2(3) . . ? 
O10 Co3 O11 87.3(3) 4_565 . ? 
O10 Co3 O11 83.9(3) . . ? 
O17 Co3 O9 99.2(4) . . ? 
O18 Co3 O9 103.3(4) . . ? 
O10 Co3 O9 84.0(3) 4_565 . ? 
O10 Co3 O9 83.6(3) . . ? 
O11 Co3 O9 165.0(4) . . ? 
O17 Co3 Co3 78.1(2) . 2_655 ? 
O18 Co3 Co3 141.3(2) . 2_655 ? 
O10 Co3 Co3 105.5(2) 4_565 2_655 ? 
O10 Co3 Co3 44.44(17) . 2_655 ? 
O11 Co3 Co3 124.5(2) . 2_655 ? 
O9 Co3 Co3 47.49(11) . 2_655 ? 
O17 Co3 Co3 136.8(2) . 4_565 ? 
O18 Co3 Co3 79.7(3) . 4_565 ? 
O10 Co3 Co3 44.92(16) 4_565 4_565 ? 
O10 Co3 Co3 105.41(19) . 4_565 ? 
O11 Co3 Co3 129.3(2) . 4_565 ? 
O9 Co3 Co3 47.49(11) . 4_565 ? 
Co3 Co3 Co3 90.0 2_655 4_565 ? 
O3 S1 O4 116.4(5) . . ? 
O3 S1 C10 111.1(5) . . ? 
O4 S1 C10 109.1(5) . . ? 
O3 S1 C2 107.7(5) . . ? 
O4 S1 C2 107.0(6) . . ? 
C10 S1 C2 104.9(5) . . ? 
O6 S2 O7 114.8(5) . . ? 
O6 S2 C14 109.9(5) . . ? 
O7 S2 C14 107.0(5) . . ? 
O6 S2 C21 110.0(5) . . ? 
O7 S2 C21 106.5(5) . . ? 
C14 S2 C21 108.4(5) . . ? 
O11 S3 O12 116.4(5) . . ? 
O11 S3 C31 109.6(4) . . ? 
O12 S3 C31 108.1(5) . . ? 
O11 S3 C29 108.1(5) . 4_565 ? 
O12 S3 C29 107.3(5) . 4_565 ? 
C31 S3 C29 107.0(5) . 4_565 ? 
Co1 O1 Co1 86.8(3) . 11_556 ? 
Co1 O1 Co2 148.5(5) . 11_556 ? 
Co1 O1 Co2 85.04(13) 11_556 11_556 ? 
Co1 O1 Co2 85.04(13) . . ? 
Co1 O1 Co2 148.5(5) 11_556 . ? 
Co2 O1 Co2 86.2(3) 11_556 . ? 
C1 O2 Co1 134.12(16) . . ? 
C1 O2 Co1 134.12(16) . 11_556 ? 
Co1 O2 Co1 91.7(3) . 11_556 ? 
S1 O3 Co1 122.1(5) . . ? 
C9 O5 Co1 131.7(6) . . ? 
C9 O5 Co2 134.3(6) . . ? 
Co1 O5 Co2 88.9(2) . . ? 
S2 O6 Co2 118.6(5) . . ? 
C20 O8 Co2 134.2(2) . . ? 
C20 O8 Co2 134.2(2) . 11_556 ? 
Co2 O8 Co2 91.5(4) . 11_556 ? 
Co3 O9 Co3 85.0(2) 2_655 . ? 
Co3 O9 Co3 145.7(8) 2_655 4_565 ? 
Co3 O9 Co3 85.0(2) . 4_565 ? 
Co3 O9 Co3 85.0(2) 2_655 3_665 ? 
Co3 O9 Co3 145.7(8) . 3_665 ? 
Co3 O9 Co3 85.0(2) 4_565 3_665 ? 
S3 O11 Co3 122.1(4) . . ? 
C39 O13 Co1 131.0(8) . . ? 
C39 O14 Co2 126.2(8) . . ? 
C47 O15 Co1 125.1(9) . . ? 
C46 O17 Co3 129.5(8) . . ? 
C46 O18 Co3 128.0(9) 4_565 . ? 
O2 C1 C2 122.0(6) . . ? 
O2 C1 C2 122.0(6) . 11_556 ? 
C2 C1 C2 116.0(12) . 11_556 ? 
C3 C2 C1 121.5(14) . . ? 
C3 C2 S1 113.6(12) . . ? 
C1 C2 S1 124.9(8) . . ? 
C2 C3 C4 122.7(18) . . ? 
C2 C3 H3 118.6 . . ? 
C4 C3 H3 118.6 . . ? 
C3 C4 C3 114.2(19) . 11_556 ? 
C3 C4 C5 122.6(10) . . ? 
C3 C4 C5 122.6(10) 11_556 . ? 
C4 C5 C6 111.0(18) . 11_556 ? 
C4 C5 C6 111.0(18) . . ? 
C6 C5 C6 97(3) 11_556 . ? 
C4 C5 C7 110(2) . . ? 
C6 C5 C7 114.0(19) 11_556 . ? 
C6 C5 C7 114.0(19) . . ? 
C8 C7 C5 138(2) . . ? 
C7 C8 H8A 103.2 . . ? 
C7 C8 H8B 112.5 . . ? 
H8A C8 H8B 109.5 . . ? 
O5 C9 C10 125.2(9) . . ? 
O5 C9 C14 120.7(9) . . ? 
C10 C9 C14 113.9(9) . . ? 
C11 C10 C9 124.4(11) . . ? 
C11 C10 S1 114.2(9) . . ? 
C9 C10 S1 121.2(7) . . ? 
C10 C11 C12 122.6(13) . . ? 
C10 C11 H11 118.7 . . ? 
C12 C11 H11 118.7 . . ? 
C11 C12 C15 122.1(17) . . ? 
C11 C12 C13 114.9(13) . . ? 
C15 C12 C13 122.8(14) . . ? 
C14 C13 C12 120.3(12) . . ? 
C14 C13 H13 119.9 . . ? 
C12 C13 H13 119.9 . . ? 
C13 C14 C9 123.6(10) . . ? 
C13 C14 S2 113.5(9) . . ? 
C9 C14 S2 122.7(8) . . ? 
C12 C15 C16 112(2) . . ? 
C12 C15 C18 111(2) . . ? 
C16 C15 C18 103(2) . . ? 
C12 C15 C17 111.2(18) . . ? 
C16 C15 C17 101(2) . . ? 
C18 C15 C17 118(2) . . ? 
C15 C16 H16A 109.5 . . ? 
C15 C16 H16B 109.5 . . ? 
H16A C16 H16B 109.5 . . ? 
C15 C16 H16C 109.5 . . ? 
H16A C16 H16C 109.5 . . ? 
H16B C16 H16C 109.5 . . ? 
C15 C17 H17A 109.5 . . ? 
C15 C17 H17B 109.5 . . ? 
H17A C17 H17B 109.5 . . ? 
C15 C17 H17C 109.5 . . ? 
H17A C17 H17C 109.5 . . ? 
H17B C17 H17C 109.5 . . ? 
C15 C18 C19 87(2) . . ? 
C15 C18 H18A 114.1 . . ? 
C19 C18 H18A 114.1 . . ? 
C15 C18 H18B 114.1 . . ? 
C19 C18 H18B 114.1 . . ? 
H18A C18 H18B 111.3 . . ? 
C18 C19 H19A 109.5 . . ? 
C18 C19 H19B 109.5 . . ? 
H19A C19 H19B 109.5 . . ? 
C18 C19 H19C 109.5 . . ? 
H19A C19 H19C 109.5 . . ? 
H19B C19 H19C 109.5 . . ? 
O8 C20 C21 122.2(6) . . ? 
O8 C20 C21 122.2(6) . 11_556 ? 
C21 C20 C21 115.5(12) . 11_556 ? 
C22 C21 C20 123.9(11) . . ? 
C22 C21 S2 112.2(8) . . ? 
C20 C21 S2 123.9(8) . . ? 
C23 C22 C21 116.0(14) . . ? 
C23 C22 H22 122.0 . . ? 
C21 C22 H22 122.0 . . ? 
C22 C23 C22 124.6(19) . 11_556 ? 
C22 C23 C24 117.7(9) . . ? 
C22 C23 C24 117.7(9) 11_556 . ? 
C26 C24 C26 41(3) . 11_556 ? 
C26 C24 C25 126(2) . . ? 
C26 C24 C25 91.1(17) 11_556 . ? 
C26 C24 C25 91.1(17) . 11_556 ? 
C26 C24 C25 126(2) 11_556 11_556 ? 
C25 C24 C25 107(2) . 11_556 ? 
C26 C24 C23 105(2) . . ? 
C26 C24 C23 105(2) 11_556 . ? 
C25 C24 C23 112.9(10) . . ? 
C25 C24 C23 112.9(10) 11_556 . ? 
C24 C25 H25A 109.5 . . ? 
C24 C25 H25B 109.5 . . ? 
H25A C25 H25B 109.5 . . ? 
C24 C25 H25C 109.5 . . ? 
H25A C25 H25C 109.5 . . ? 
H25B C25 H25C 109.5 . . ? 
C30 C31 C32 123.7(10) . . ? 
C30 C31 S3 125.8(7) . . ? 
C32 C31 S3 110.4(8) . . ? 
C31 C32 C33 118.7(11) . . ? 
C31 C32 H32 120.6 . . ? 
C33 C32 H32 120.6 . . ? 
C28 C33 C32 118.0(12) . . ? 
C28 C33 C34 121.8(17) . . ? 
C32 C33 C34 120.2(16) . . ? 
C35 C34 C36 105(2) . . ? 
C35 C34 C37 113(2) . . ? 
C36 C34 C37 112(2) . . ? 
C35 C34 C33 107.0(19) . . ? 
C36 C34 C33 109(2) . . ? 
C37 C34 C33 111(2) . . ? 
C34 C35 H35A 109.5 . . ? 
C34 C35 H35B 109.5 . . ? 
H35A C35 H35B 109.5 . . ? 
C34 C35 H35C 109.5 . . ? 
H35A C35 H35C 109.5 . . ? 
H35B C35 H35C 109.5 . . ? 
C34 C36 H36A 109.5 . . ? 
C34 C36 H36B 109.5 . . ? 
H36A C36 H36B 109.5 . . ? 
C34 C36 H36C 109.5 . . ? 
H36A C36 H36C 109.5 . . ? 
H36B C36 H36C 109.5 . . ? 
C34 C37 C38 107(2) . . ? 
C34 C37 H37A 110.3 . . ? 
C38 C37 H37A 110.3 . . ? 
C34 C37 H37B 110.3 . . ? 
C38 C37 H37B 110.3 . . ? 
H37A C37 H37B 108.6 . . ? 
C37 C38 H38A 109.5 . . ? 
C37 C38 H38B 109.5 . . ? 
H38A C38 H38B 109.5 . . ? 
C37 C38 H38C 109.5 . . ? 
H38A C38 H38C 109.5 . . ? 
H38B C38 H38C 109.5 . . ? 
O13 C39 O14 123.0(10) . . ? 
O13 C39 C40 122.1(12) . . ? 
O14 C39 C40 114.9(11) . . ? 
C45 C40 C41 118.1(11) . . ? 
C45 C40 C39 123.5(12) . . ? 
C41 C40 C39 118.1(12) . . ? 
C40 C41 C42 120.6(12) . . ? 
C40 C41 H41 119.7 . . ? 
C42 C41 H41 119.7 . . ? 
C41 C42 C43 120.0(11) . . ? 
C41 C42 H42 120.0 . . ? 
C43 C42 H42 120.0 . . ? 
C44 C43 C42 116.8(11) . . ? 
C44 C43 C46 122.9(14) . . ? 
C42 C43 C46 120.1(13) . . ? 
C45 C44 C43 120.0(15) . . ? 
C45 C44 H44 120.0 . . ? 
C43 C44 H44 120.0 . . ? 
C40 C45 C44 124.2(14) . . ? 
C40 C45 H45 117.9 . . ? 
C44 C45 H45 117.9 . . ? 
O18 C46 O17 124.2(12) 2_655 . ? 
O18 C46 C43 120.5(14) 2_655 . ? 
O17 C46 C43 115.3(14) . . ? 
O15 C47 O15 130.8(17) . 11_556 ? 
O15 C47 C48 114.4(9) . . ? 
O15 C47 C48 114.4(9) 11_556 . ? 
C49 C48 C49 110.1(16) . 11_556 ? 
C49 C48 C47 124.8(8) . . ? 
C49 C48 C47 124.8(8) 11_556 . ? 
C50 C49 C48 131.0(15) . . ? 
C50 C49 H49 114.5 . . ? 
C48 C49 H49 114.5 . . ? 
C49 C50 C51 111.5(13) . . ? 
C49 C50 H50 124.2 . . ? 
C51 C50 H50 124.2 . . ? 
C5 C6 H6A 109.5 . . ? 
C5 C6 H6B 109.5 . . ? 
H6A C6 H6B 109.5 . . ? 
C5 C6 H6C 109.5 . . ? 
H6A C6 H6C 109.5 . . ? 
H6B C6 H6C 109.5 . . ? 
C26 C26 C24 69.5(15) 11_556 . ? 
C26 C26 C27 114(2) 11_556 . ? 
C24 C26 C27 132(3) . . ? 
C26 C26 C27 40.3(14) 11_556 11_556 ? 
C24 C26 C27 96(2) . 11_556 ? 
C27 C26 C27 74(3) . 11_556 ? 
C26 C27 C26 25.4(19) . 11_556 ? 
C50 C51 C50 124.0(15) . 11_556 ? 
C50 C51 C52 117.7(7) . . ? 
C50 C51 C52 117.7(7) 11_556 . ? 
O16 C52 O16 122.8(17) 11_556 . ? 
O16 C52 C51 118.6(8) 11_556 . ? 
O16 C52 C51 118.6(8) . . ? 
C52 O16 Co2 129.5(10) . 10_566 ? 
C33 C28 C29 118.5(13) . . ? 
C33 C28 H28A 120.7 . . ? 
C29 C28 H28A 120.7 . . ? 
C30 C29 C28 122.6(12) . . ? 
C30 C29 S3 125.7(8) . 2_655 ? 
C28 C29 S3 110.7(9) . 2_655 ? 
C31 C30 O10 120.3(8) . . ? 
C31 C30 C29 117.6(9) . . ? 
O10 C30 C29 121.6(10) . . ? 
C30 O10 Co3 132.6(6) . 2_655 ? 
C30 O10 Co3 135.5(6) . . ? 
Co3 O10 Co3 90.6(2) 2_655 . ? 
 
# SQUEEZE RESULTS (APPEND TO CIF)
# Note: Data are Listed for all Voids in the P1 Unit Cell
# i.e. Centre of Gravity, Solvent Accessible Volume,
# Recovered number of Electrons in the Void and
# Details about the Squeezed Material
loop_
  _platon_squeeze_void_nr
  _platon_squeeze_void_average_x
  _platon_squeeze_void_average_y
  _platon_squeeze_void_average_z
  _platon_squeeze_void_volume
  _platon_squeeze_void_count_electrons
  _platon_squeeze_void_content
   1  0.000 -0.007 -0.003     19582      3598 ' '
   2  0.000  0.000  0.500       408        71 ' '
   3  0.500  0.500  0.000       408        71 ' '
_platon_squeeze_details
;
;
 
_diffrn_measured_fraction_theta_max    0.825 
_diffrn_reflns_theta_full              23.01 
_diffrn_measured_fraction_theta_full   0.825 
_refine_diff_density_max    0.891 
_refine_diff_density_min   -0.544 
_refine_diff_density_rms    0.092 
